# Supplementary material for: Interstitial lung disease increases susceptibility to and severity of COVID-19
Source: PubMed Central journal article supplement — Eur Respir J. 2021 Dec 2;58(6):2004125. doi: 10.1183/13993003.04125-2020 (PMC8061231; doi:10.1183/13993003.04125-2020), 2021-12-02

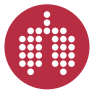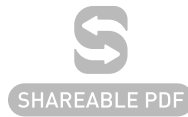

# Interstitial lung disease increases susceptibility to and severity of COVID-19

Hyun Lee<sup>1,5</sup>, Hayoung Choi<sup>ID 2,5</sup>, Bumhee Yang<sup>3,5</sup>, Sun-Kyung Lee<sup>1,4</sup>, Tai Sun Park<sup>1</sup>, Dong Won Park<sup>ID 1</sup>, Ji-Yong Moon<sup>1</sup>, Tae-Hyung Kim<sup>ID 1</sup>, Jang Won Sohn<sup>1</sup>, Ho Joo Yoon<sup>1</sup> and Sang-Heon Kim<sup>ID 1</sup>

<sup>1</sup>Division of Pulmonary Medicine and Allergy, Dept of Internal Medicine, Hanyang University College of Medicine, Seoul, Korea. <sup>2</sup>Division of Pulmonary, Allergy and Critical Care Medicine, Dept of Internal Medicine, Hallym University Kangnam Sacred Heart Hospital, Hallym University College of Medicine, Seoul, Korea. <sup>3</sup>Division of Pulmonary and Critical Care Medicine, Dept of Medicine, Chungbuk National University Hospital, Cheongju, Korea. <sup>4</sup>Dept of Mathematics, College of Natural Sciences, Hanyang University, Seoul, Korea. <sup>5</sup>These three authors contributed equally to this work.

Corresponding author: Sang-Heon Kim ([sangheonkim@hanyang.ac.kr](mailto:sangheonkim@hanyang.ac.kr))

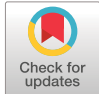

Shareable abstract (@ERSpublications)

The risks of COVID-19 and severe presentation were significantly higher in patients with ILD than in those without ILD. Clinicians should be aware of the increased risk of COVID-19 in their ILD patients and manage them appropriately amid this pandemic. <https://bit.ly/3guOE6d>

**Cite this article as:** Lee H, Choi H, Yang B, *et al.* Interstitial lung disease increases susceptibility to and severity of COVID-19. *Eur Respir J* 2021; 58: 2004125 [DOI: 10.1183/13993003.04125-2020].

This single-page version can be shared freely online.

Copyright ©The authors 2021.

This version is distributed under the terms of the Creative Commons Attribution Non-Commercial Licence 4.0. For commercial reproduction rights and permissions contact [permissions@ersnet.org](mailto:permissions@ersnet.org)

This article has an editorial commentary: <https://doi.org/10.1183/13993003.01956-2021>

Received: 9 Nov 2020  
Accepted: 14 April 2021

## Abstract

**Background** There are limited data regarding the relationship between interstitial lung disease (ILD) and the natural course of COVID-19. In this study, we investigate whether patients with ILD are more susceptible to COVID-19 than those without ILD and evaluate the impact of ILD on disease severity in patients with COVID-19.

**Methods** A nationwide cohort of patients with COVID-19 (n=8070) and a 1:15 age-, sex- and residential area-matched cohort (n=121 050) were constructed between 1 January 2020 and 30 May 2020 in Korea. We performed a nested case-control study to compare the proportions of patients with ILD between the COVID-19 cohort and the matched cohort. Using the COVID-19 cohort, we also evaluated the risk of severe COVID-19 in patients with ILD *versus* those without ILD.

**Results** The proportion of patients with ILD was significantly higher in the COVID-19 cohort than in the matched cohort (0.8% *versus* 0.4%; p<0.001). The odds of having ILD was significantly higher in the COVID-19 cohort than in the matched cohort (adjusted OR 2.02, 95% CI 1.54–2.61). Among patients in the COVID-19 cohort, patients with ILD were more likely to have severe COVID-19 than patients without ILD (47.8% *versus* 12.6%), including mortality (13.4% *versus* 2.8%) (all p<0.001). The risk of severe COVID-19 was significantly higher in patients with ILD than in those without ILD (adjusted OR 2.23, 95% CI 1.24–4.01).

**Conclusion** The risks of COVID-19 and severe presentation were significantly higher in patients with ILD than in those without ILD.

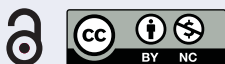

Supplement: ERJ-04125-2020.Shareable.pdf [file ERJ-04125-2020.Shareable.pdf]
